# Supplementary material
Source: PubMed Central journal article supplement (PMC2765490)
Supplement: NIHMS91413-supplement-1_si_001.pdf [file NIHMS91413-supplement-1_si_001.pdf]

**Synthesis of New Apoptosis-Inducing Iminophosphorane Organogold(III)  
Complexes and Study of Their Interactions with Biomolecular Targets**

*Neha Shaik,<sup>a</sup> Alberto Martínez,<sup>a</sup> Idline Augustin,<sup>a</sup> Hugh Giovinazzo,<sup>b</sup> Armando Varela-Ramírez,<sup>b</sup> Mercedes Sanaú,<sup>c</sup> Renato Aguilera,<sup>b</sup> and María Contel<sup>\*a</sup>*

<sup>a</sup>Department of Chemistry, Brooklyn College and The Graduate Center, The City University of New York, Brooklyn, NY, 11210, US. <sup>b</sup>Department of Biological Sciences, The University of Texas at El Paso, El Paso, TX 79968, US. <sup>c</sup>Departamento de Química Inorgánica, Universidad de Valencia, Burjassot, Valencia, 46100, Spain.

\*To whom correspondence should be addressed. Address: Department of Chemistry, Brooklyn College and The Graduate Center, The City University of New York, Brooklyn, NY, 11210, US. Phone: +1-7189515000 x2833. Fax: +1-7189514607. E-mail: [mariacontel@brooklyn.cuny.edu](mailto:mariacontel@brooklyn.cuny.edu).

Supplementary Material

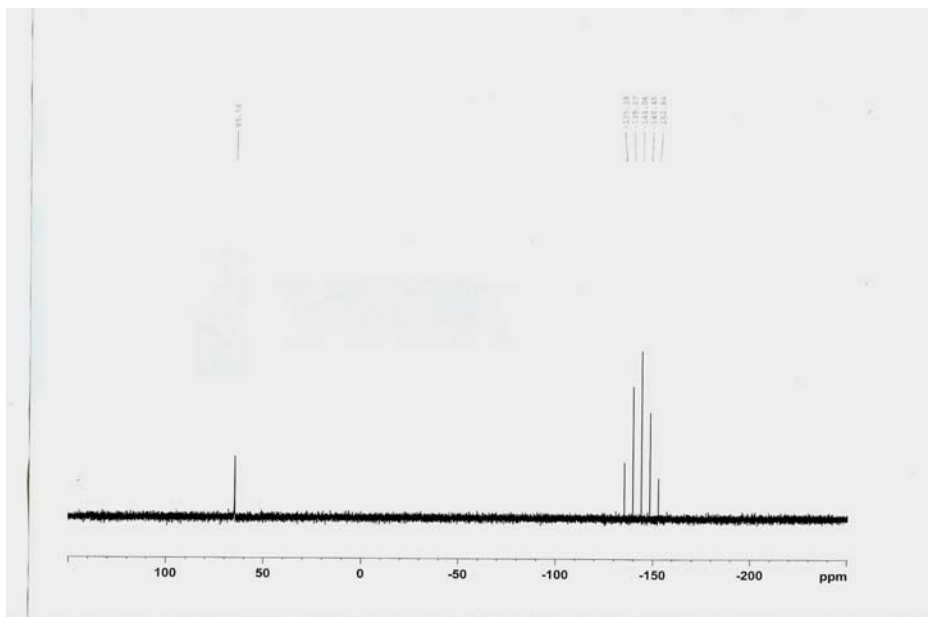

(b)

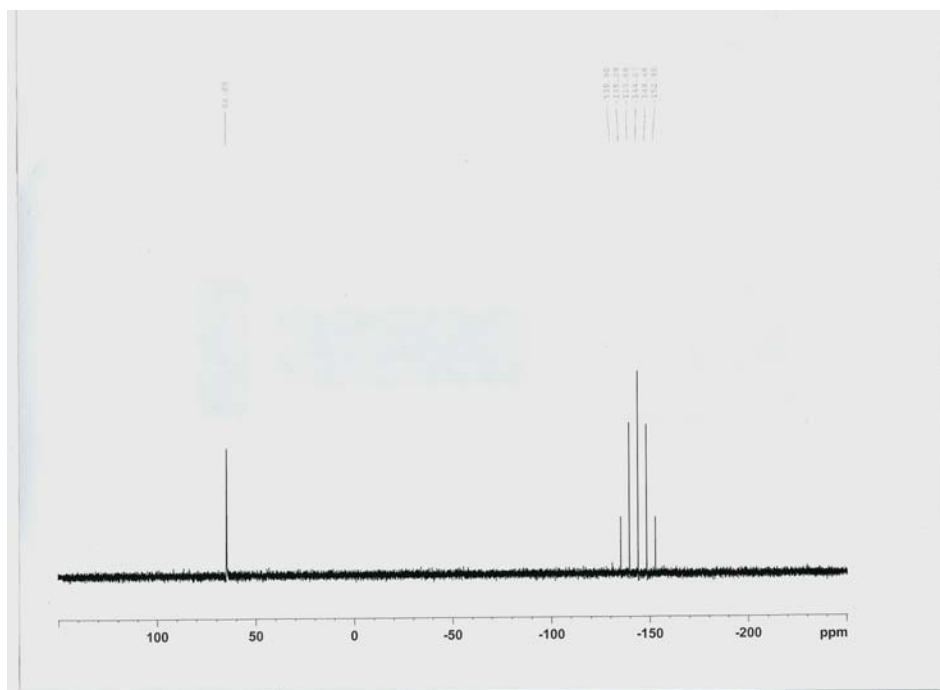

(a)

S1. (a)  $^{31}\text{P}$  NMR spectrum of **2** in  $\text{d}^6$ -DMSO at RT. (b) After 108 days at RT.

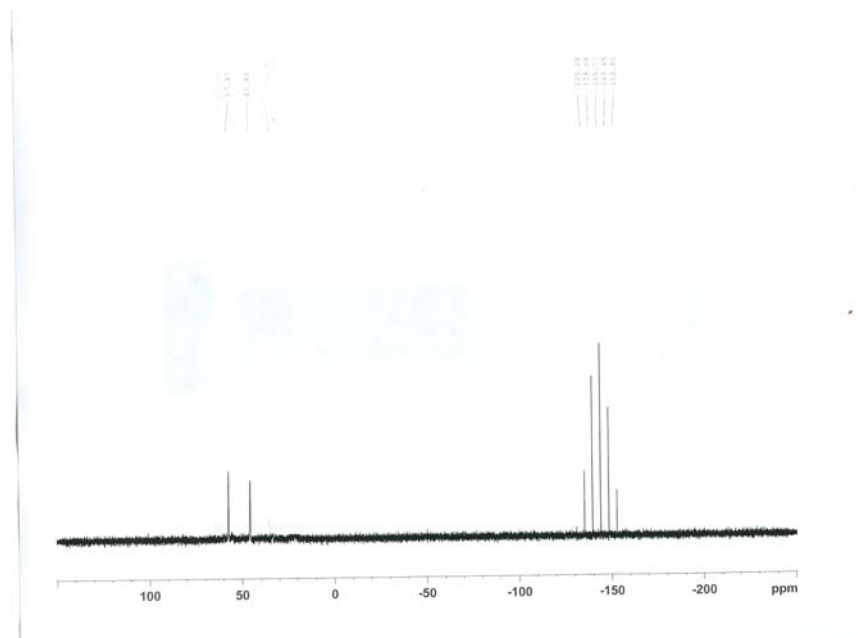

(b)

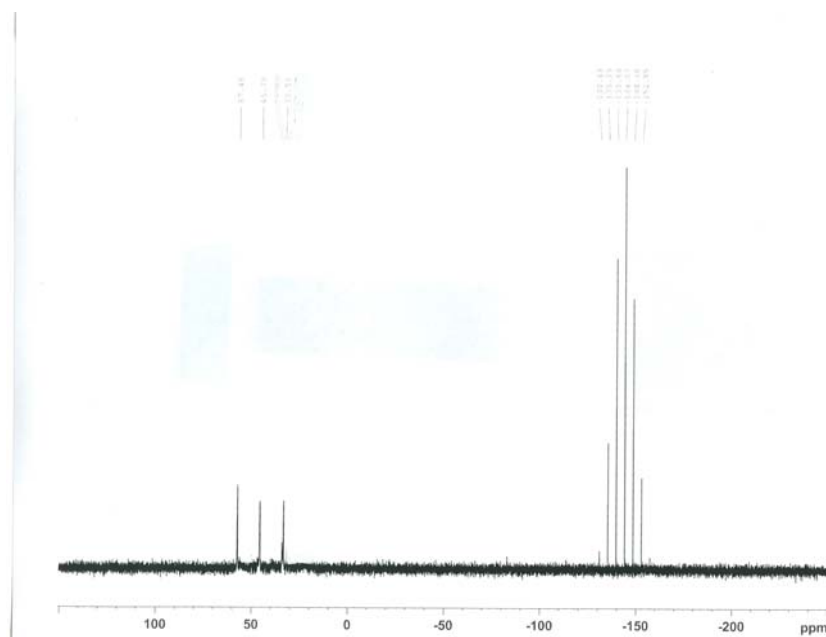

S2. (a)  $^{31}\text{P}$  NMR spectrum of **4** in  $\text{d}^6$ -DMSO at RT. (b) After 12 days at RT.

(a)

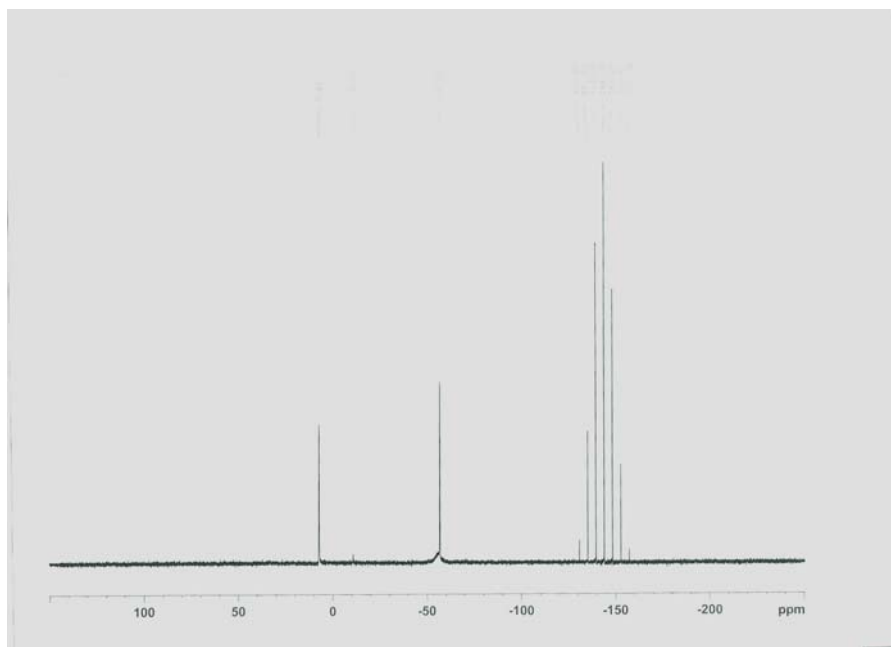

(b)

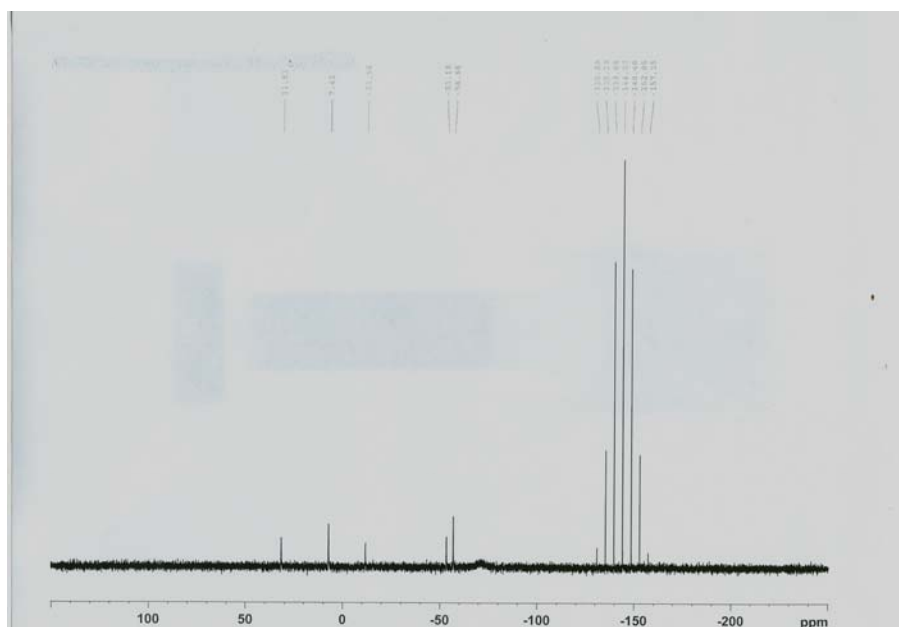

S4. (a)  $^{31}\text{P}$  NMR spectrum of **5** in  $\text{d}^6$ -DMSO at RT. (b) After 7 days at RT.
